# Supplementary material for: Gene Promoter Evolution Targets the Center of the Human Protein Interaction Network
Source: PubMed Central journal article supplement (PMC2900212; doi:10.1371/journal.pone.0011476), 2010-07-08
Supplement: pone.0011476.s003.pdf [file pone.0011476.s003.pdf]

**Table S2.** Functional analysis of *Prom*<sup>+</sup> genes, *Cod*<sup>+</sup> genes and genes with positive selection either in the promoter or the coding region (*Positive genes*), showing the number of genes in the reference sets, the number of genes in the experimental sets and the p-values of a hypergeometric test for different PANTHER Ontology terms.

| Biological Process                                 | Reference <i>Prom</i> <sup>+</sup> genes | <i>Prom</i> <sup>+</sup> genes | p-value      | Reference <i>Cod</i> <sup>+</sup> genes | <i>Cod</i> <sup>+</sup> genes | p-value      | Reference <i>Positive genes</i> | <i>Positive genes</i> | p-value      |
|----------------------------------------------------|------------------------------------------|--------------------------------|--------------|-----------------------------------------|-------------------------------|--------------|---------------------------------|-----------------------|--------------|
| Nucleoside, nucleotide and nucleic acid metabolism | 928                                      | 67                             | 0,186        | 789                                     | 64                            | 0,336        | 1379                            | 127                   | 0,166        |
| Signal transduction                                | 878                                      | 54                             | 0,015        | 820                                     | 66                            | 0,305        | 1376                            | 119                   | 0,040        |
| Protein metabolism                                 | 867                                      | 83                             | <b>0,040</b> | 637                                     | 59                            | <b>0,272</b> | 1195                            | 140                   | <b>0,018</b> |
| Developmental processes                            | 607                                      | 44                             | 0,263        | 541                                     | 54                            | <b>0,123</b> | 927                             | 95                    | <b>0,397</b> |
| mRNA transcription                                 | 445                                      | 23                             | 0,011        | 437                                     | 33                            | 0,242        | 714                             | 55                    | 0,018        |
| Protein modification                               | 441                                      | 46                             | <b>0,035</b> | 341                                     | 33                            | <b>0,251</b> | 621                             | 78                    | <b>0,017</b> |
| Cell surface receptor mediated signal transduction | 354                                      | 30                             | <b>0,398</b> | 369                                     | 24                            | 0,080        | 606                             | 54                    | 0,206        |
| Transport                                          | 417                                      | 31                             | 0,370        | 285                                     | 19                            | 0,140        | 562                             | 50                    | 0,214        |
| Immunity and defense                               | 371                                      | 26                             | 0,269        | 293                                     | 18                            | 0,073        | 535                             | 43                    | 0,069        |
| Cell communication                                 | 336                                      | 13                             | 0,001        | 301                                     | 26                            | <b>0,515</b> | 508                             | 39                    | 0,041        |
| Intracellular protein traffic                      | 323                                      | 22                             | 0,244        | 266                                     | 21                            | 0,395        | 464                             | 43                    | 0,338        |
| Cell structure and motility                        | 290                                      | 25                             | <b>0,378</b> | 255                                     | 22                            | <b>0,521</b> | 450                             | 46                    | <b>0,449</b> |
| Cell cycle                                         | 282                                      | 22                             | <b>0,585</b> | 242                                     | 18                            | 0,306        | 419                             | 40                    | 0,425        |
| Intracellular signalling cascade                   | 239                                      | 16                             | 0,267        | 229                                     | 22                            | <b>0,316</b> | 378                             | 37                    | 0,498        |
| Cell proliferation and differentiation             | 227                                      | 18                             | <b>0,554</b> | 230                                     | 19                            | 0,492        | 372                             | 37                    | <b>0,531</b> |
| Lipid, fatty acid and steroid metabolism           | 220                                      | 14                             | 0,219        | 177                                     | 14                            | 0,441        | 316                             | 28                    | 0,290        |
| Other metabolism                                   | 188                                      | 22                             | <b>0,044</b> | 133                                     | 12                            | <b>0,471</b> | 252                             | 32                    | <b>0,089</b> |
| Carbohydrate metabolism                            | 157                                      | 16                             | <b>0,188</b> | 151                                     | 18                            | <b>0,093</b> | 249                             | 34                    | <b>0,035</b> |
| Neuronal activities                                | 151                                      | 8                              | 0,135        | 150                                     | 18                            | <b>0,088</b> | 245                             | 26                    | <b>0,397</b> |
| Cell adhesion                                      | 161                                      | 10                             | 0,247        | 133                                     | 15                            | <b>0,164</b> | 240                             | 24                    | <b>0,525</b> |
| Oncogenesis                                        | 132                                      | 6                              | 0,087        | 127                                     | 11                            | <b>0,532</b> | 204                             | 17                    | 0,258        |
| Apoptosis                                          | 135                                      | 8                              | 0,236        | 114                                     | 10                            | <b>0,518</b> | 200                             | 18                    | 0,377        |
| Protein biosynthesis                               | 141                                      | 16                             | <b>0,097</b> | 108                                     | 5                             | 0,088        | 197                             | 21                    | <b>0,405</b> |
| mRNA processing                                    | 96                                       | 7                              | 0,493        | 81                                      | 7                             | <b>0,549</b> | 138                             | 14                    | <b>0,513</b> |
| Sensory perception                                 | 77                                       | 4                              | 0,251        | 71                                      | 11                            | <b>0,038</b> | 124                             | 15                    | <b>0,251</b> |
| Amino acid metabolism                              | 83                                       | 7                              | <b>0,501</b> | 62                                      | 7                             | <b>0,279</b> | 115                             | 14                    | <b>0,253</b> |
| Protein targeting and localization                 | 81                                       | 10                             | <b>0,111</b> | 60                                      | 6                             | <b>0,410</b> | 107                             | 16                    | <b>0,064</b> |
| Electron transport                                 | 68                                       | 2                              | 0,082        | 47                                      | 5                             | <b>0,377</b> | 98                              | 7                     | 0,227        |
| Homeostasis                                        | 68                                       | 4                              | 0,356        | 47                                      | 1                             | 0,079        | 94                              | 5                     | 0,083        |
| Coenzyme and prosthetic group metabolism           | 67                                       | 8                              | <b>0,164</b> | 37                                      | 4                             | <b>0,393</b> | 86                              | 12                    | <b>0,145</b> |
| Muscle contraction                                 | 64                                       | 3                              | 0,235        | 39                                      | 8                             | <b>0,016</b> | 81                              | 11                    | <b>0,180</b> |
| Miscellaneous                                      | 48                                       | 5                              | <b>0,339</b> | 40                                      | 4                             | <b>0,452</b> | 69                              | 9                     | <b>0,246</b> |
| Phosphate metabolism                               | 51                                       | 7                              | <b>0,110</b> | 23                                      | 5                             | <b>0,042</b> | 56                              | 12                    | <b>0,008</b> |
| Sulfur metabolism                                  | 22                                       | 3                              | <b>0,256</b> | 27                                      | 2                             | <b>0,687</b> | 43                              | 5                     | <b>0,429</b> |
| Blood circulation and gas exchange                 | 18                                       | 1                              | <b>0,778</b> | 21                                      | 2                             | <b>0,548</b> | 33                              | 3                     | <b>0,652</b> |
| Nitrogen metabolism                                | 3                                        | 1                              | <b>0,221</b> | 6                                       | 0                             | 1,000        | 8                               | 1                     | <b>0,568</b> |
| Non-vertebrate process                             | 5                                        | 0                              | 1,000        | 3                                       | 0                             | 1,000        | 6                               | 0                     | 1,000        |
