# Supplementary material for: Gene Promoter Evolution Targets the Center of the Human Protein Interaction Network
Source: PubMed Central journal article supplement (PMC2900212; doi:10.1371/journal.pone.0011476), 2010-07-08
Supplement: pone.0011476.s004.pdf [file pone.0011476.s004.pdf]

**Table S3.** Functional analysis of the set of genes with positive selection both in the promoter and in the protein-coding region, showing the number of genes in the reference set, the number of genes in the experimental set and the p-values of a hypergeometric test for different PANTHER Ontology terms.

| <b>Biological Process</b>                          | <b>Reference</b> | <b>Positive genes</b> | <b>p-value</b> |
|----------------------------------------------------|------------------|-----------------------|----------------|
| Cell proliferation and differentiation             | 95               | 7                     | 0.01           |
| Developmental processes                            | 224              | 6                     | 0.01           |
| Nucleoside, nucleotide and nucleic acid metabolism | 339              | 5                     | 0.18           |
| Signal transduction                                | 327              | 4                     | 0.35           |
| Protein metabolism                                 | 312              | 4                     | 0.32           |
| Cell cycle                                         | 112              | 4                     | 0.02           |
| Cell structure and motility                        | 96               | 2                     | 0.22           |
| Metabolism                                         | 69               | 2                     | 0.13           |
| mRNA processing                                    | 41               | 2                     | 0.05           |
| Cell adhesion                                      | 54               | 1                     | 0.39           |
| Immunity and defense                               | 129              | 1                     | 0.72           |
| mRNA transcription                                 | 168              | 1                     | 0.80           |
