# Supplementary material for: Gene Promoter Evolution Targets the Center of the Human Protein Interaction Network
Source: PubMed Central journal article supplement (PMC2900212; doi:10.1371/journal.pone.0011476), 2010-07-08
Supplement: pone.0011476.s006.pdf [file pone.0011476.s006.pdf]

**Table S5.** Main statistics of the distributions of the centrality parameters in *Prom*<sup>+</sup> genes.

|                    | <i>Prom</i> <sup>+</sup> genes |       |         |          | <i>Prom</i> <sup>+</sup> genes reference |       |         |          |
|--------------------|--------------------------------|-------|---------|----------|------------------------------------------|-------|---------|----------|
|                    | Min.                           | Max.  | Mean    | Median   | Min.                                     | Max.  | Mean    | Median   |
| <b>Degree</b>      | 1                              | 162   | 7.42    | 3.00     | 1                                        | 348   | 6.57    | 3.00     |
| <b>Betweenness</b> | 0                              | 0.017 | 0.00050 | 0.000032 | 0                                        | 0.049 | 0.00044 | 0.000016 |
| <b>ASPL</b>        | 3.08                           | 6.11  | 4.14    | 4.09     | 2.9                                      | 7.25  | 4.24    | 4.16     |
| <b>EVC</b>         | 0.0000030                      | 0.19  | 0.023   | 0.0059   | 0                                        | 1.00  | 0.019   | 0.0043   |

*Prom*<sup>+</sup> genes, n = 188. *Prom*<sup>+</sup> genes reference, n = 2219. Min.: the lowest value of the distribution. Max.: the highest value of the distribution.
