# Supplementary material for: Gene Promoter Evolution Targets the Center of the Human Protein Interaction Network
Source: PubMed Central journal article supplement (PMC2900212; doi:10.1371/journal.pone.0011476), 2010-07-08
Supplement: pone.0011476.s007.pdf [file pone.0011476.s007.pdf]

**Table S6.** Main statistics of the distributions of the centrality parameters in *Cod<sup>+</sup>* genes.

|                    | <i>Cod<sup>+</sup></i> genes |       |         |          | <i>Cod<sup>+</sup></i> genes reference |      |         |          |
|--------------------|------------------------------|-------|---------|----------|----------------------------------------|------|---------|----------|
|                    | Min.                         | Max.  | Mean    | Median   | Min.                                   | Max. | Mean    | Median   |
| <b>Degree</b>      | 1                            | 126   | 5.92    | 2.50     | 1                                      | 475  | 7.52    | 3.00     |
| <b>Betweenness</b> | 0                            | 0.018 | 0.00040 | 0.000013 | 0                                      | 0.11 | 0.00053 | 0.000022 |
| <b>ASPL</b>        | 3.27                         | 5.82  | 4.29    | 4.26     | 2.79                                   | 8.02 | 4.22    | 4.15     |
| <b>EVC</b>         | 0.0000070                    | 0.22  | 0.010   | 0.0026   | 0                                      | 0.83 | 0.020   | 0.0047   |

*Cod<sup>+</sup>* genes, n = 152. *Cod<sup>+</sup>* genes reference, n = 1811. min.: the lowest value of the distribution. max.: the highest value of the distribution.
