# Supplementary material for: Gene Promoter Evolution Targets the Center of the Human Protein Interaction Network
Source: PubMed Central journal article supplement (PMC2900212; doi:10.1371/journal.pone.0011476), 2010-07-08
Supplement: pone.0011476.s009.pdf [file pone.0011476.s009.pdf]

**Table S8.** Functional analysis of the set of twenty genes containing the top ten central *Prom*<sup>+</sup> genes and the top ten central *Cod*<sup>+</sup> genes (*Positive genes*), showing the number of genes in the global reference set, the number of genes in the experimental set and the p-values of a hypergeometric test for different PANTHER Ontology terms.

| <b>Biological Process</b>                          | <b>Reference *</b> | <b>Positive genes</b> | <b>p-value</b> |
|----------------------------------------------------|--------------------|-----------------------|----------------|
| Signal transduction                                | 1379               | 8                     | 0.0098         |
| Protein metabolism                                 | 1195               | 8                     | 0.0040         |
| Cell proliferation and differentiation             | 372                | 8                     | 1.33e-06       |
| Nucleoside, nucleotide and nucleic acid metabolism | 1379               | 6                     | 0.093          |
| Cell cycle                                         | 419                | 5                     | 0.0026         |
| mRNA transcription                                 | 714                | 5                     | 0.023          |
| Intracellular protein traffic                      | 464                | 4                     | 0.021          |
| Developmental processes                            | 927                | 3                     | 0.38           |
| Cell structure and motility                        | 450                | 2                     | 0.29           |
| Cell surface receptor mediated signal transduction | 606                | 2                     | 0.42           |
| Apoptosis                                          | 200                | 2                     | 0.080          |
| Metabolism                                         | 252                | 2                     | 0.12           |
| mRNA processing                                    | 138                | 2                     | 0.042          |
| Phosphate metabolism                               | 56                 | 2                     | 0.0075         |
| Protein targeting and localization                 | 107                | 2                     | 0.026          |
| Cell communication                                 | 508                | 1                     | 0.71           |
| Immunity and defense                               | 535                | 1                     | 0.73           |
| Intracellular signalling cascade                   | 378                | 1                     | 0.60           |
| Protein biosynthesis                               | 197                | 1                     | 0.38           |
| Muscle contraction                                 | 81                 | 1                     | 0.18           |

\*The reference set is obtained taking into account the union of the set of genes analyzed in this study and the set of genes analyzed in Berglund's work.
