# Supplementary material for: Gene Promoter Evolution Targets the Center of the Human Protein Interaction Network
Source: PubMed Central journal article supplement (PMC2900212; doi:10.1371/journal.pone.0011476), 2010-07-08
Supplement: pone.0011476.s010.pdf [file pone.0011476.s010.pdf]

**Table S9.** Functional analysis of the set of twenty genes containing the top ten central *Prom*<sup>+</sup> genes and the top ten central *Cod*<sup>+</sup> genes (*Positive genes*), showing the number of genes in the central reference set, the number of genes in the experimental set and the p-values of a hypergeometric test for different PANTHER Ontology terms.

| <b>Biological Process</b>                          | <b>Reference<sup>*</sup></b> | <b>Positive genes</b> | <b>p-value</b> |
|----------------------------------------------------|------------------------------|-----------------------|----------------|
| Signal transduction                                | 70                           | 8                     | 0.0048         |
| Protein metabolism                                 | 164                          | 8                     | 0.40           |
| Cell proliferation and differentiation             | 26                           | 8                     | 2.43e-06       |
| Nucleoside, nucleotide and nucleic acid metabolism | 101                          | 6                     | 0.25           |
| Cell cycle                                         | 52                           | 5                     | 0.060          |
| mRNA transcription                                 | 31                           | 5                     | 0.0071         |
| Intracellular protein traffic                      | 52                           | 4                     | 0.17           |
| Developmental processes                            | 27                           | 3                     | 0.10           |
| Cell structure and motility                        | 36                           | 2                     | 0.47           |
| Cell surface receptor mediated signal transduction | 22                           | 2                     | 0.24           |
| Apoptosis                                          | 21                           | 2                     | 0.23           |
| Metabolism                                         | 14                           | 2                     | 0.12           |
| mRNA processing                                    | 23                           | 2                     | 0.26           |
| Phosphate metabolism                               | 8                            | 2                     | 0.042          |
| Protein targeting and localization                 | 12                           | 2                     | 0.089          |
| Cell communication                                 | 12                           | 1                     | 0.41           |
| Immunity and defense                               | 30                           | 1                     | 0.74           |
| Intracellular signalling cascade                   | 28                           | 1                     | 0.72           |
| Muscle contraction                                 | 6                            | 1                     | 0.23           |
| Miscellaneous                                      | 4                            | 1                     | 0.16           |

\*The reference set is obtained taking into account the union of the set of genes analyzed in this study and the set of genes analyzed in Berglund's work and selecting those having an Eigenvalue centrality (EVC) higher than the minimum EVC of positively selected central genes as defined.
